# Supplementary material
Source: publisher figshare collection journal article supplement (https://future-science-group.figshare.com/ndownloader/files/23902727)

**Supplementary Material**

**Supplementary Table 1.** Solution affinities of mAb1 and mAb2 for their target antigen (Ag) measured on Gyrolab and KinExA 3000.

| Technique | mAb1 | | mAb2 | |
| --- | --- | --- | --- | --- |
| KD (pM) | 95% CI (pM) | KD (pM) | 95% CI (pM) |
| GyroLab | 52 | 14-90 | 37 | 6-68 |
| KinExA | 41 | 33-51 | 14 | 11-17 |

CI: confidence interval

**Supplementary Figure 1.** Bioanalytical characterization of Adnectin samples. (A) SDS-PAGE: lane 1, standard; lane 3, His-ADX_5322_A02-DBCO; lane 5, ADX_5322_A02-DBCO; lane 6, 19F-BMS-986192; lanes 2 and 4, other constructs. (B) Analytical SEC. (C) Mass spectrometry (MS).

**
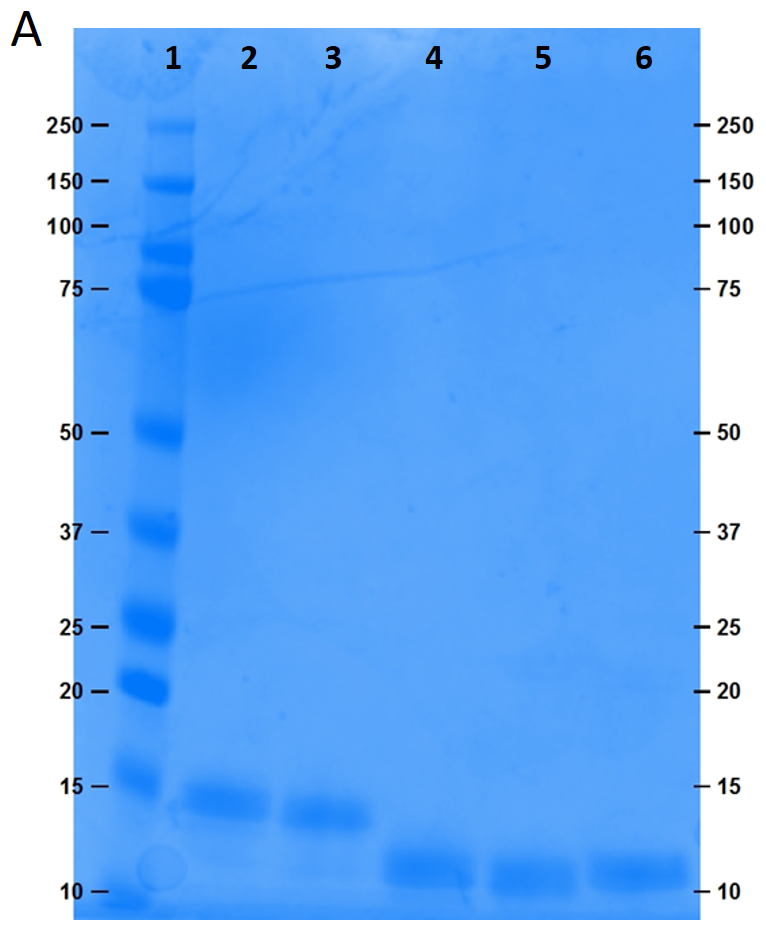
**

**
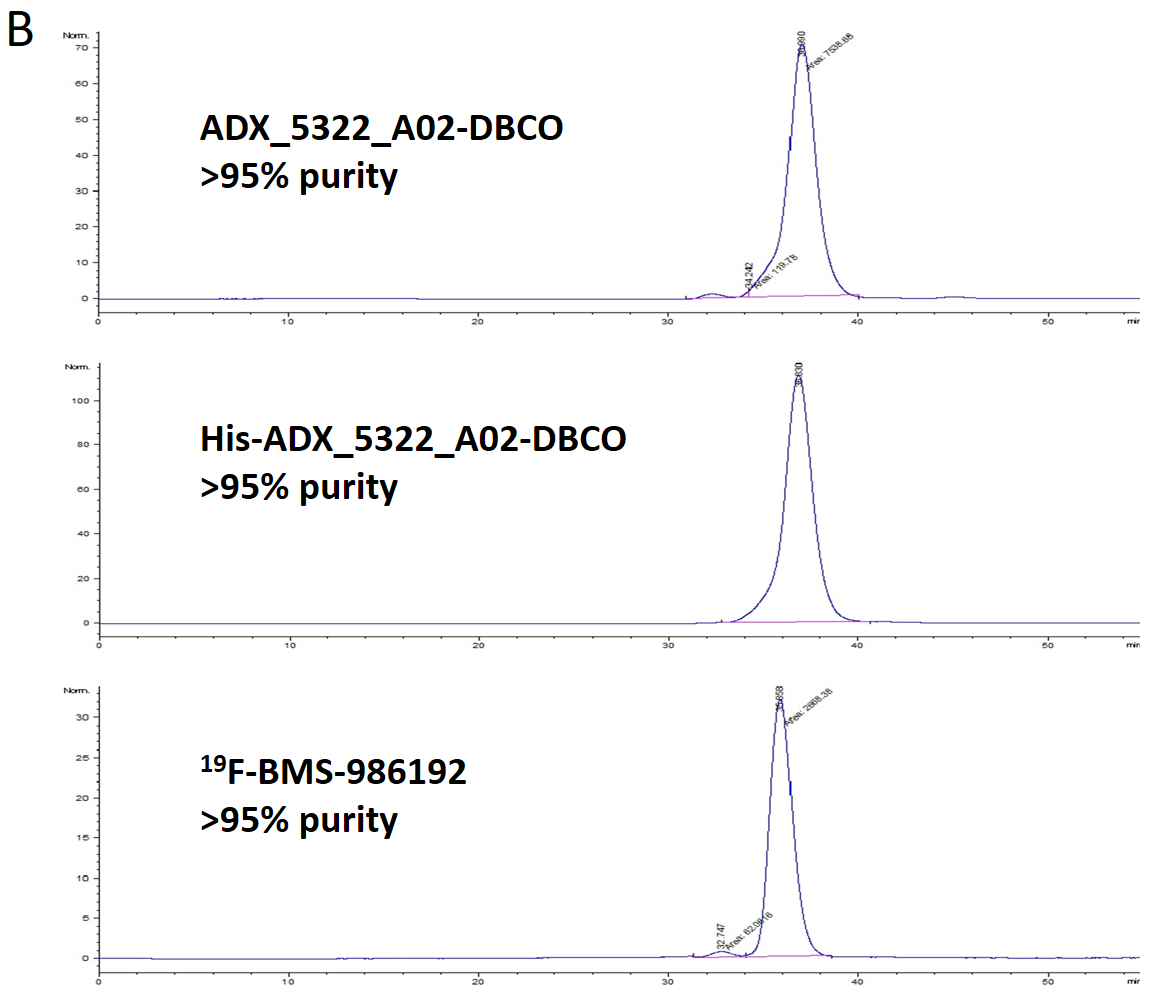
**

**
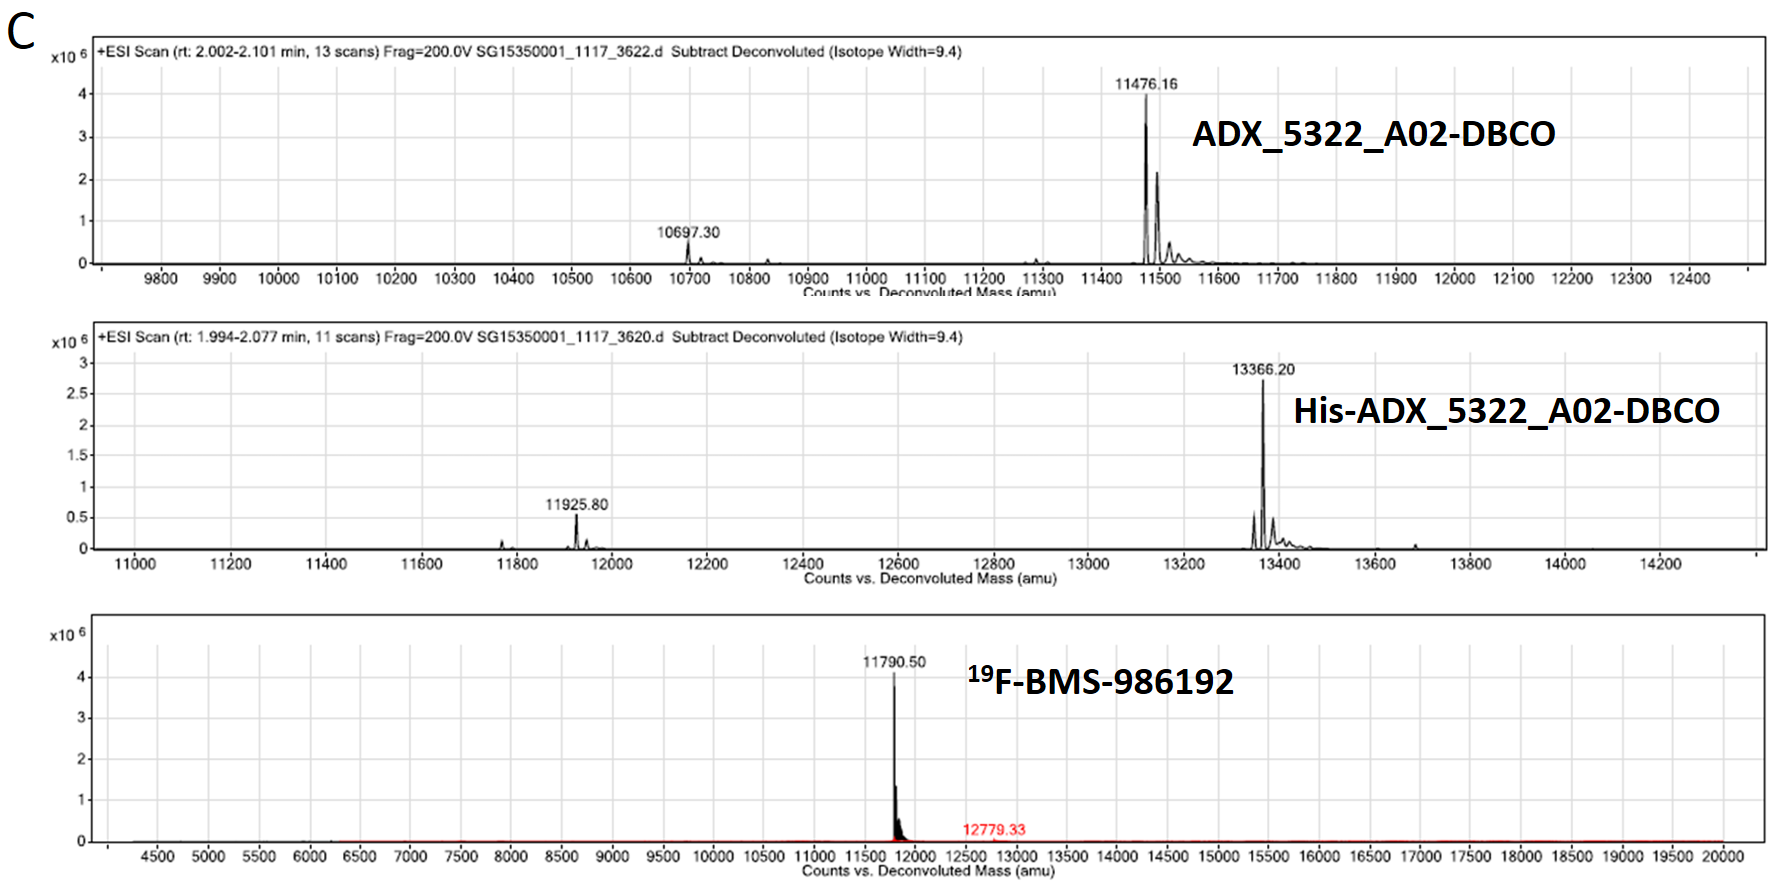
**

**Supplementary Figure 2.** Multi-curve analysis of the affinity series for PD-L1 Adnectins after 22 h or 44 h equilibration at room temperature (data points and fitted curve: 50 pM Adnectin in orange and 150 pM Adnectin in blue). (A) ADX_5322_A02-DBCO, 44 h; (B) His-ADX_5322_A02-DBCO, 22 h; (C) His-ADX_5322_A02-DBCO, 44h; (D) 19F-BMS-986192, 22 h; (E) 19F-BMS-986192, 44 h.


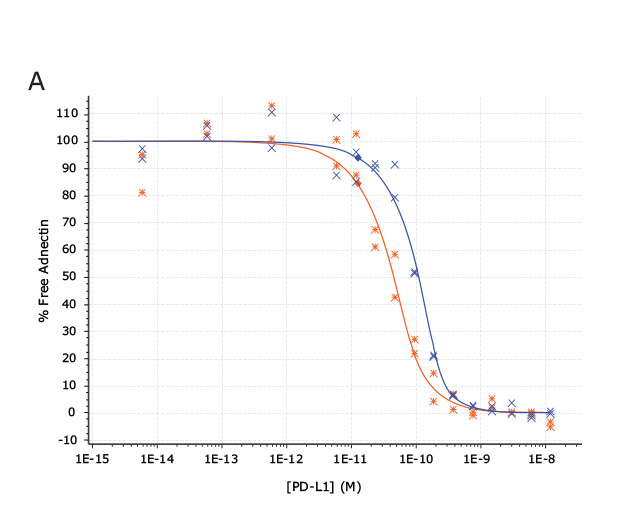


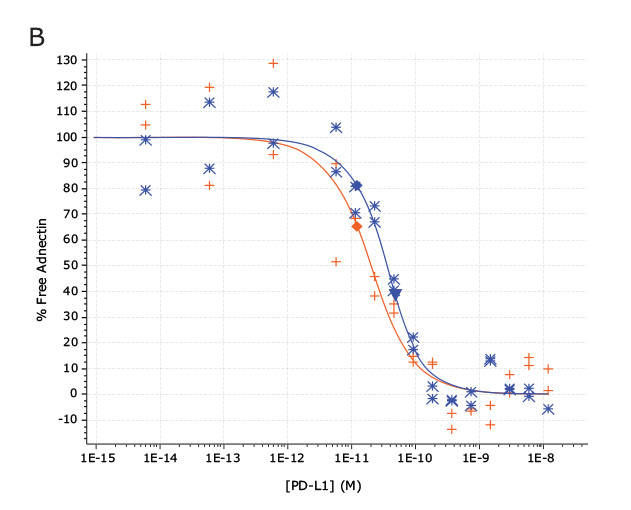


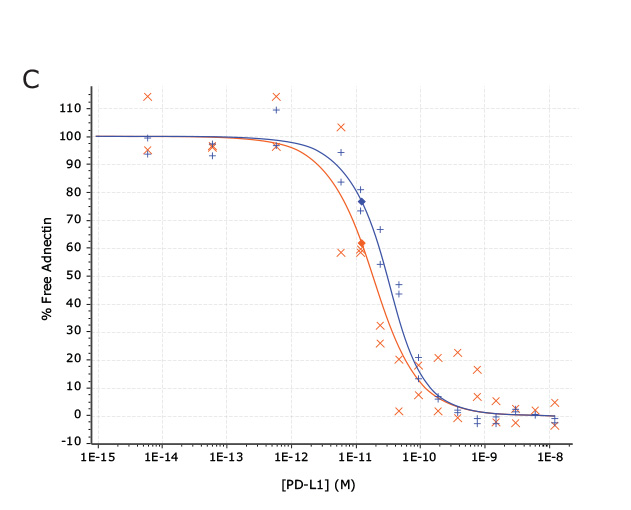


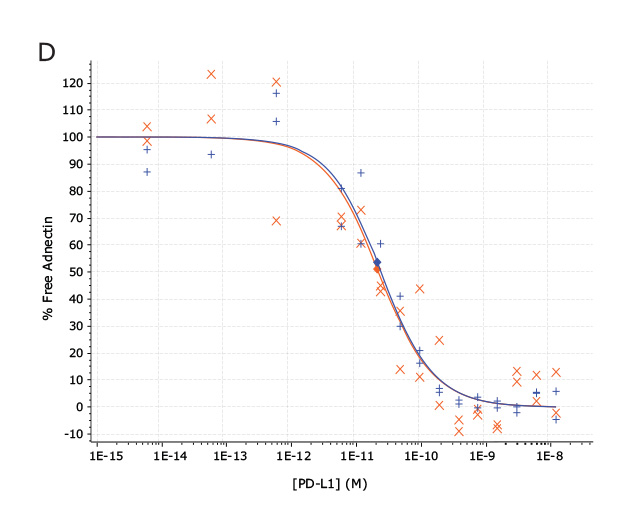


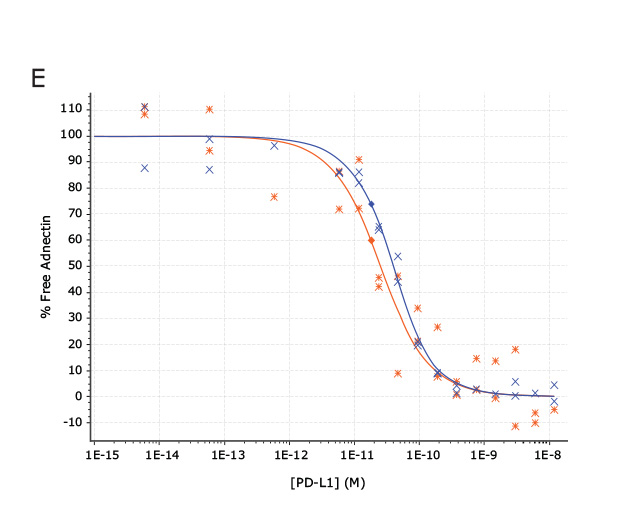

Supplement: Supplementary file 1 [file 23902727]
